# Supplementary figures and images for: Development of an Australian FASD Indigenous Framework: Aboriginal Healing-Informed and Strengths-Based Ways of Knowing, Being and Doing
Source: MDPI journal article supplement (doi:10.3390/ijerph20065215), 2023-03-22

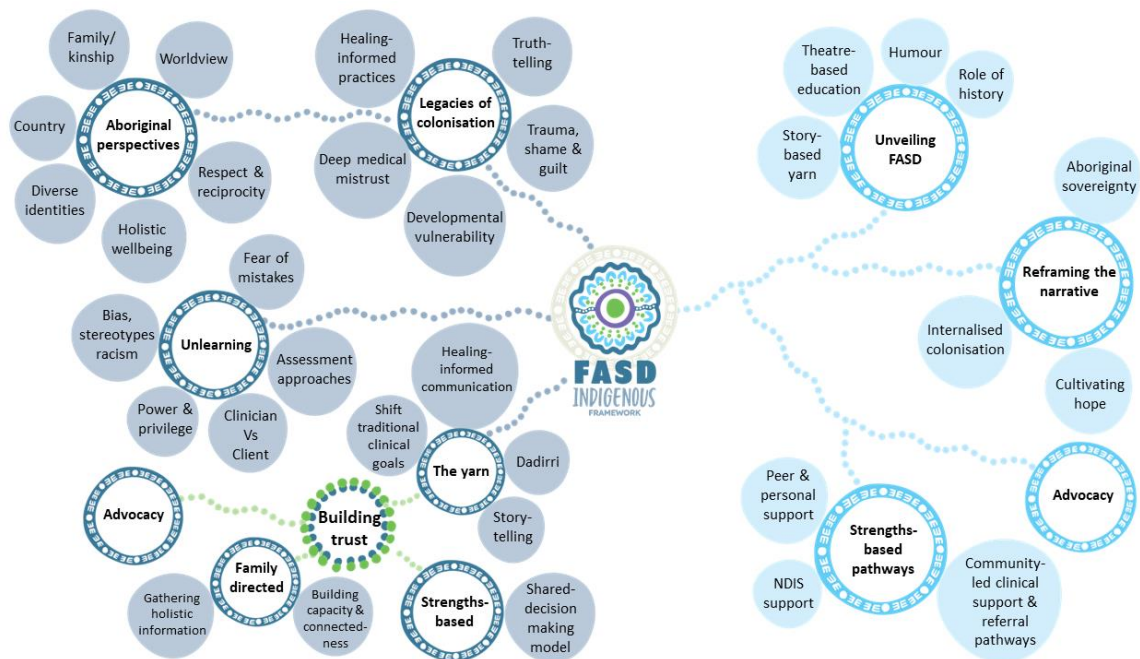

Figure S1. Detailed FASD Indigenous Framework.

Supplement: s1 [file s1]
